# Supplementary material
Source: Springer Nature journal article supplement (https://www.springermedizin.de/resource/supplementary/12908_2009_87_MOESM1_ESM.pdf/9525110)

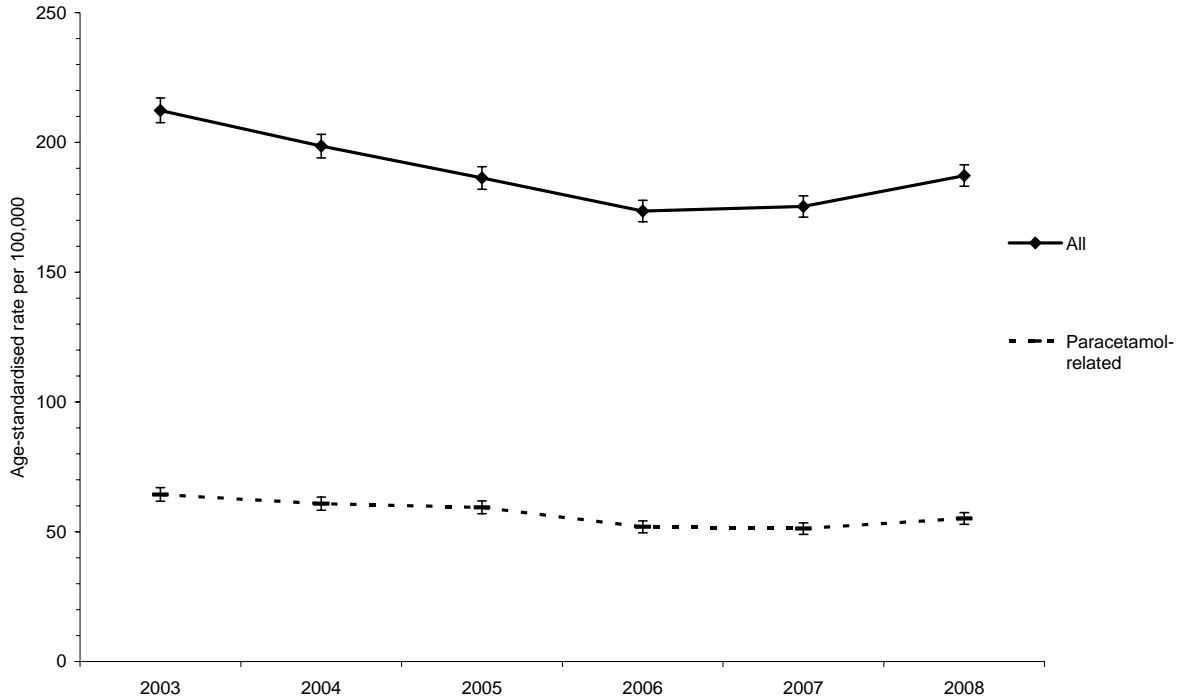

Supplement: MOESM1 [file 9525110]
